# Supplementary material for: The Childhood Cancer Diagnosis (CCD) Study: a UK observational study to describe referral pathways and quantify diagnostic intervals in children and young people with cancer
Source: PubMed Central journal article supplement (PMC8852751; doi:10.1136/bmjopen-2021-058744), 2022-02-16
Supplement: bmjopen-2021-058744supp001.pdf [file bmjopen-2021-058744supp001.pdf]

Table S1. Eligible tumour types

| Main Diagnostic Group               | Subgroup                                                                                                                                                                                                                                                                                                                                                                                                                                                                                                                                                                                                                                                                                                                                                                                                                                                                          |
|-------------------------------------|-----------------------------------------------------------------------------------------------------------------------------------------------------------------------------------------------------------------------------------------------------------------------------------------------------------------------------------------------------------------------------------------------------------------------------------------------------------------------------------------------------------------------------------------------------------------------------------------------------------------------------------------------------------------------------------------------------------------------------------------------------------------------------------------------------------------------------------------------------------------------------------|
| <b>I. Leukaemia</b>                 | (a) Lymphoid leukaemia<br>(b) Acute myeloid leukaemia<br>(c) Chronic myeloproliferative diseases<br>(d) Myelodysplastic syndrome or other myeloproliferative diseases<br>(e) Other                                                                                                                                                                                                                                                                                                                                                                                                                                                                                                                                                                                                                                                                                                |
| <b>II. Lymphoma &amp; related</b>   | (a) Hodgkin lymphoma<br>(b) Non-Hodgkin lymphoma except Burkitt lymphoma<br>(c) Burkitt lymphoma<br>(d) Lymphoreticular<br>(e) Other                                                                                                                                                                                                                                                                                                                                                                                                                                                                                                                                                                                                                                                                                                                                              |
| <b>III. CNS tumour <sup>1</sup></b> | (a) Ependymoma and choroid plexus tumour<br>(a.1) Ependymoma<br>(a.2) Choroid plexus tumours <ul style="list-style-type: none"> <li>• Papilloma</li> <li>• Atypical papilloma</li> <li>• Carcinoma</li> </ul> (b) Astrocytoma <ul style="list-style-type: none"> <li>• Pilocytic</li> <li>• Subependymal giant cell</li> <li>• Gliofibroma</li> <li>• Protoplasmic</li> <li>• Gemistocytic</li> <li>• Fibrillary</li> <li>• Pleomorphic xanthoastrocytoma</li> <li>• Pilomyxoid</li> <li>• Anaplastic</li> <li>• Glioblastoma</li> <li>• Unspecified (optic nerve)</li> <li>• Unspecified (other sites)</li> </ul> (c) Intracranial and intraspinal embryonal tumour<br>(c.1) Medulloblastoma <ul style="list-style-type: none"> <li>• Desmoplastic/nodular/extensive nodularity</li> <li>• Medullomyoblastoma</li> <li>• Large cell/anaplastic</li> <li>• Unspecified</li> </ul> |

<sup>1</sup> Stiller, C.A., Bayne, A.M., Chakrabarty, A. *et al.* Incidence of childhood CNS tumours in Britain and variation in rates by definition of malignant behaviour: population-based study. *BMC Cancer* **19**, 139 (2019). <https://doi.org/10.1186/s12885-019-5344-7>

| Main Diagnostic Group    | Subgroup                                                                                                                                                                                                                                                                                                                                                                                                                                                                                                                                                                                                                                                                                                                                                                                                                                                                                                                                                                                                                                                                                                                                                                                                                |
|--------------------------|-------------------------------------------------------------------------------------------------------------------------------------------------------------------------------------------------------------------------------------------------------------------------------------------------------------------------------------------------------------------------------------------------------------------------------------------------------------------------------------------------------------------------------------------------------------------------------------------------------------------------------------------------------------------------------------------------------------------------------------------------------------------------------------------------------------------------------------------------------------------------------------------------------------------------------------------------------------------------------------------------------------------------------------------------------------------------------------------------------------------------------------------------------------------------------------------------------------------------|
|                          | <p>(c.2) PNET<br/> (c.3) Medulloepithelioma/neuroepithelioma<br/> (c.4) Atypical teratoid/rhabdoid tumour</p> <p>(d) Other glioma<br/> (d.1) Oligodendroglioma<br/> (d.2) Mixed and unspecified gliomas<br/> <ul style="list-style-type: none"> <li>• Mixed</li> <li>• Angiocentric glioma</li> <li>• Unspecified</li> </ul> (d.3) Other neuroepithelial tumours<br/> <ul style="list-style-type: none"> <li>• Gliomatosis cerebri</li> <li>• Papillary tumour of the pineal region</li> </ul> <p>(e) Other specified intracranial and intraspinal neoplasms<br/> (e.1) Pituitary adenoma<br/> (e.2) Craniopharyngioma<br/> (e.3) Pineal parenchymal tumours<br/> <ul style="list-style-type: none"> <li>• Pineocytoma</li> <li>• Pineoblastoma incl. PTID</li> </ul> (e.4) Mixed glial-neuronal tumours<br/> <ul style="list-style-type: none"> <li>• Desmoplastic infantile astrocytoma</li> <li>• Dysembryoplastic neuroepithelial tumour</li> <li>• Ganglioglioma</li> <li>• Central neurocytoma</li> <li>• Papillary glioneuronal tumour</li> <li>• Gangliocytoma</li> </ul> (e.5) Meningioma</p> <p>(f) Unspecified tumours</p> <p><b>** Please note that germ cell tumours should be coded under Xa</b></p> </p> |
| <b>IV. Neuroblastoma</b> | <p>(a) Neuroblastoma and ganglioneuroblastoma<br/> (b) Other peripheral nervous cell tumour</p>                                                                                                                                                                                                                                                                                                                                                                                                                                                                                                                                                                                                                                                                                                                                                                                                                                                                                                                                                                                                                                                                                                                         |

| Main Diagnostic Group          | Subgroup                                                                                                                                                                                                                                                                                                                                            |
|--------------------------------|-----------------------------------------------------------------------------------------------------------------------------------------------------------------------------------------------------------------------------------------------------------------------------------------------------------------------------------------------------|
| <b>V. Retinoblastoma</b>       | --                                                                                                                                                                                                                                                                                                                                                  |
| <b>VI. Renal tumour</b>        | (a) Nephroblastoma and other nonepithelial renal tumour<br>(a.1) Nephroblastoma (Wilms tumour)<br>(a.2) Rhabdoid renal tumour<br>(a.3) Kidney sarcoma <ul style="list-style-type: none"> <li>• CCS clear cell sarcoma (8964)</li> <li>• Other</li> </ul> (a.4) pPNET of kidney<br><br>(b) Renal carcinoma<br>(c) Unspecified malignant renal tumour |
| <b>VII. Hepatic tumour</b>     | (a) Hepatoblastoma<br>(b) Hepatic carcinoma<br>(c) Unspecified malignant hepatic tumour                                                                                                                                                                                                                                                             |
| <b>VIII. Bone tumour</b>       | (a) Osteosarcomas<br>(b) Chondrosarcomas<br>(c) Ewing tumour and related sarcomas of bone <ul style="list-style-type: none"> <li>• Ewing tumour</li> <li>• Askin tumour of bone</li> <li>• pPNET of bone</li> </ul> (d) Other specified malignant bone tumour<br>(e) Unspecified malignant bone tumour                                              |
| <b>IX. Soft tissue sarcoma</b> | (a) Rhabdomyosarcomas<br>(b) Fibrosarcomas, peripheral nerve sheath tumour, and other fibrous neoplasms (Non-rhabdomyosarcoma soft tissue sarcomas NRSTS)<br>(c) Kaposi sarcoma<br>(d) Other specified soft tissue sarcomas<br>(e) Unspecified soft tissue sarcomas                                                                                 |
| <b>X. Germ cell tumour</b>     | (a) Intracranial and intraspinal germ cell tumours<br>(b) Malignant extracranial and extragonadal germ cell tumour                                                                                                                                                                                                                                  |

| Main Diagnostic Group                         | Subgroup                                                                                                                                                                                                                                                                                                                                                                                                                                                                           |
|-----------------------------------------------|------------------------------------------------------------------------------------------------------------------------------------------------------------------------------------------------------------------------------------------------------------------------------------------------------------------------------------------------------------------------------------------------------------------------------------------------------------------------------------|
|                                               | <ul style="list-style-type: none"> <li>(c) Malignant gonadal germ cell tumour</li> <li>(d) Gonadal carcinoma</li> <li>(e) Other and unspecified malignant gonadal tumour</li> </ul>                                                                                                                                                                                                                                                                                                |
| <b>XI. Carcinoma &amp; melanoma</b>           | <ul style="list-style-type: none"> <li>(a) Adrenocortical carcinomas</li> <li>(b) Thyroid carcinomas</li> <li>(c) Nasopharyngeal carcinomas</li> <li>(d) Malignant melanomas</li> <li>(e) Skin carcinomas</li> <li>(f) Other and unspecified carcinomas</li> </ul>                                                                                                                                                                                                                 |
| <b>XII. Other &amp; unspecified malignant</b> | <ul style="list-style-type: none"> <li>(a) Other specified malignant tumour               <ul style="list-style-type: none"> <li>(a.1) Gastrointestinal stromal tumour</li> <li>(a.2) Pancreatoblastoma</li> <li>(a.3) Pulmonary blastoma and pleuropulmonary blastoma</li> <li>(a.4) Other complex mixed and stromal neoplasms</li> <li>(a.5) Mesothelioma</li> <li>(a.6) Other specified malignant tumour</li> </ul> </li> <li>(b) Other unspecified malignant tumour</li> </ul> |
