# Supplementary material for: The Childhood Cancer Diagnosis (CCD) Study: a UK observational study to describe referral pathways and quantify diagnostic intervals in children and young people with cancer
Source: PubMed Central journal article supplement (PMC8852751; doi:10.1136/bmjopen-2021-058744), 2022-02-16
Supplement: bmjopen-2021-058744supp002.pdf [file bmjopen-2021-058744supp002.pdf]

Participant study number: \_\_\_\_\_

**THE CHILDHOOD CANCER DIAGNOSIS STUDY**Gender:  Male  Female

Ethnicity:

\_\_\_\_\_

Age: \_\_\_\_\_ years \_\_\_\_\_ months

Year of birth (YYYY):

\_\_\_\_\_

Diagnosis: \_\_\_\_\_

Tumour location: \_\_\_\_\_

Laterality (if applicable): L / R / Midline/ Bilateral

Tumour stage: \_\_\_\_\_

Clinical risk group (if applicable): \_\_\_\_\_

**Key dates (DD/MM/YYYY)**

- Date of symptom onset: \_\_\_\_\_  Not known
- Date of first presentation to healthcare: \_\_\_\_\_  Not known
- Date of clinical diagnosis: \_\_\_\_\_  Not known
- Date of imaging: \_\_\_\_\_  Not known
- Date of biopsy: \_\_\_\_\_  Not known

**Route to diagnosis**

- Who was the first healthcare professional (HCP) they saw about these symptoms:
  - GP  Paediatric emergency doctor  Paediatrician  Dentist  Pharmacist
  - Optometrist  Nurse practitioner  Health visitor  School nurse
  - Other (please specify \_\_\_\_\_)
- How many HCP visits before diagnosis? \_\_\_\_\_ or  1-3  4-6  7-9  10+
- Patient's place of care when the investigation that identified the tumour was requested:
  - Primary care  Outpatient  Inpatient  A&E  Other \_\_\_\_\_
- Was this an incidental finding?
  - No  Yes - asymptomatic  Yes -with non-specific symptoms
- What was the source of referral leading to diagnosis?

|                              |                                                                                                                                                                                                                                                                                                                                                        |
|------------------------------|--------------------------------------------------------------------------------------------------------------------------------------------------------------------------------------------------------------------------------------------------------------------------------------------------------------------------------------------------------|
| Emergency presentation (A&E) | <input type="checkbox"/> Self-referral <input type="checkbox"/> GP referral <input type="checkbox"/> Optician referral <input type="checkbox"/> Dentist referral<br><input type="checkbox"/> MIU/Walk In Centre/NHS 111 <input type="checkbox"/> Emergency transfer from another hospital<br><input type="checkbox"/> Other HCP (please specify) _____ |
| GP referral                  | <input type="checkbox"/> Two week wait <input type="checkbox"/> Routine referral <input type="checkbox"/> Urgent referral to general paediatrician <input type="checkbox"/> Other _____                                                                                                                                                                |

**Please keep this form in patient's medical records once completed**

CRF Childhood cancer diagnosis

Participant study number: \_\_\_\_\_

|       |                                                                                                                                                                                |
|-------|--------------------------------------------------------------------------------------------------------------------------------------------------------------------------------|
| Other | <input type="checkbox"/> Active surveillance (please specify _____)<br><input type="checkbox"/> Diagnosed by another specialty (e.g. ENT) <input type="checkbox"/> Other _____ |
|-------|--------------------------------------------------------------------------------------------------------------------------------------------------------------------------------|

**Symptoms at diagnosis** (Please tick all that apply)**Head, face, throat and neck**

- Headache
- Vomiting
- Seizures
- Fits
- Visual abnormalities
- Papilloedema
- Leukocoria
- Abnormal eye movements
- Hearing loss
- Earache
- Torticollis/head tilt/stiff neck
- Sore throat/hoarse voice
- Difficulty swallowing
- Swollen glands
- Lump/swelling in face, jaw and skull
- Limited mouth opening
- Abnormal facial movements

**Chest and Abdomen**

- Shortness of breath
- Lump/swelling in chest wall or armpits
- Chest wall pain/axillary pain
- Abdominal pain/discomfort
- Abdominal distention/mass
- Haematuria
- Blood in stool
- Change in bowel habit
- Difficulty passing urine

**Bones and Joints**

- Bone/joint swelling
- Bone/joint pain
- Limp or leg weakness
- Slow in recovery after injury to bone/joint

**Growth and Development**

- Developmental delay
- Deterioration in balance/walking/speech
- Slow growth
- Weight loss
- Loss of appetite
- Early or late puberty
- Lump/swelling in pelvis, testicle or breast
- Unexplained bleeding after sex or between periods

**Other symptoms**

- Pallor
- Changes to moles
- Excessive bleeding/bruising/petechiae
- Persistent/recurrent unexplained screaming in young children
- Multiple infections
- Tiredness or fatigue
- Fever
- Night sweats

Any other symptom not listed above:

**Please keep this form in patient's medical records once completed**

CRF Childhood cancer diagnosis
