# Supplementary material for: The Childhood Cancer Diagnosis (CCD) Study: a UK observational study to describe referral pathways and quantify diagnostic intervals in children and young people with cancer
Source: PubMed Central journal article supplement (PMC8852751; doi:10.1136/bmjopen-2021-058744), 2022-02-16
Supplement: bmjopen-2021-058744supp003.pdf [file bmjopen-2021-058744supp003.pdf]

## Childhood Cancer Diagnosis Study Principal Investigator List

|               |                        |
|---------------|------------------------|
| Aberdeen      | Dr Hugh Bishop         |
| Belfast       | Dr Robert Johnston     |
| Birmingham    | Prof Bruce Morland     |
| Bristol       | Dr Rachel Dommett      |
| Cambridge     | Dr James Nicholson     |
| Cardiff       | Dr Melanie Adams       |
| Edinburgh     | Dr Mark Brougham       |
| GOSH          | Karen Howe             |
| Glasgow       | Dr Jairam Sastry       |
| Leeds         | Dr Christopher Lethaby |
| Leicester     | Dr Emma Ross           |
| Liverpool     | Dr Katherine Cooper    |
| Manchester    | Dr Anthony Penn        |
| Newcastle     | Dr Tasnim Arif         |
| Nottingham    | Dr Madhumita Dandapani |
| Oxford        | Dr Amy Mitchell        |
| Royal Marsden | Dr Julia Chisholm      |
| Sheffield     | Dr Vicki Lee           |
| Southampton   | Jessica Bate           |
| UCLH          | Rachel Windsor         |
